# Supplementary material for: Gold nanoparticle-based lateral flow immunoassay for the rapid detection of flumetralin in orange
Source: Royal Society of Chemistry journal article supplement (doi:10.1039/d2an00899h), 2022-01-01
Supplement: d2an00899h1.pdf [file d2an00899h1.pdf]

*Supplementary Information*

**Gold nanoparticle-based lateral flow immunoassay for the  
rapid detection of flumetralin in orange**

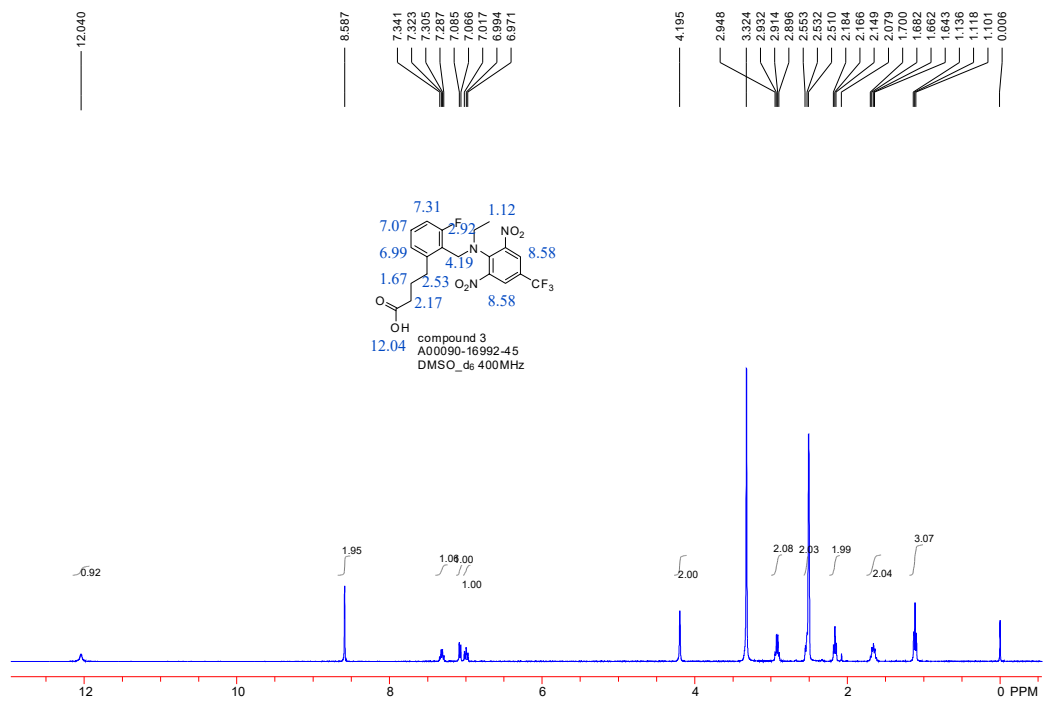

**Figure S1.** <sup>1</sup>H NMR of the flumetralin haptin.

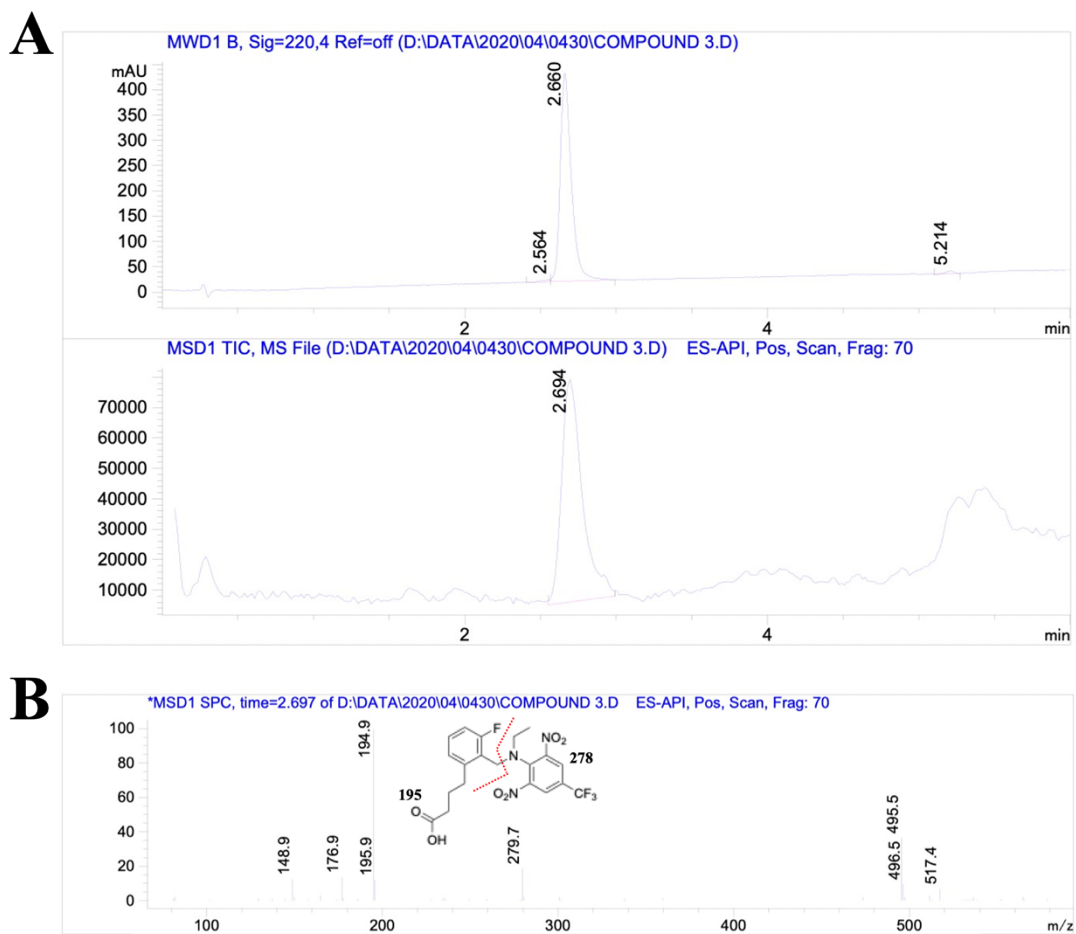

**Figure S2.** LC-MS analysis of the flumetralin hapten. (A) The liquid chromatogram.  
(B) The mass spectrum.

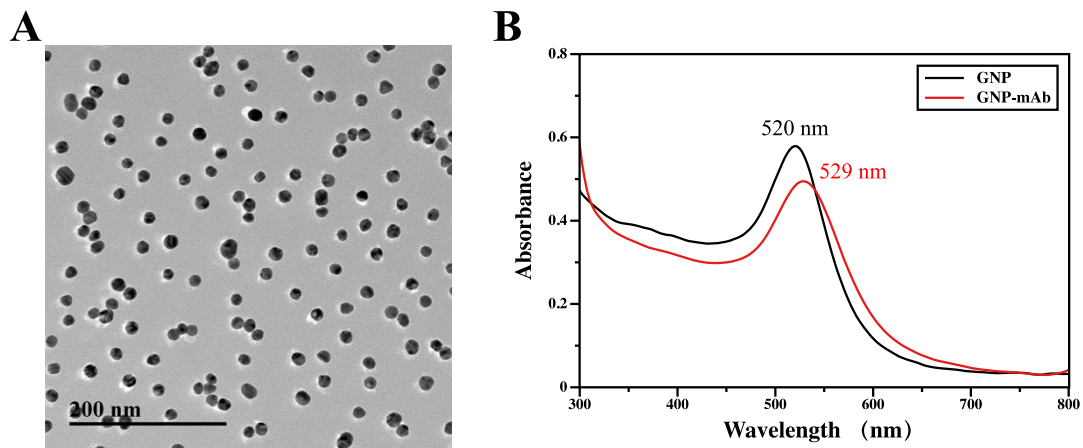

**Figure S3.** Characterization of the GNP and GNP-mAb. (A) TEM of the GNP. (B) UV spectroscopy of the GNP and GNP-mAb.

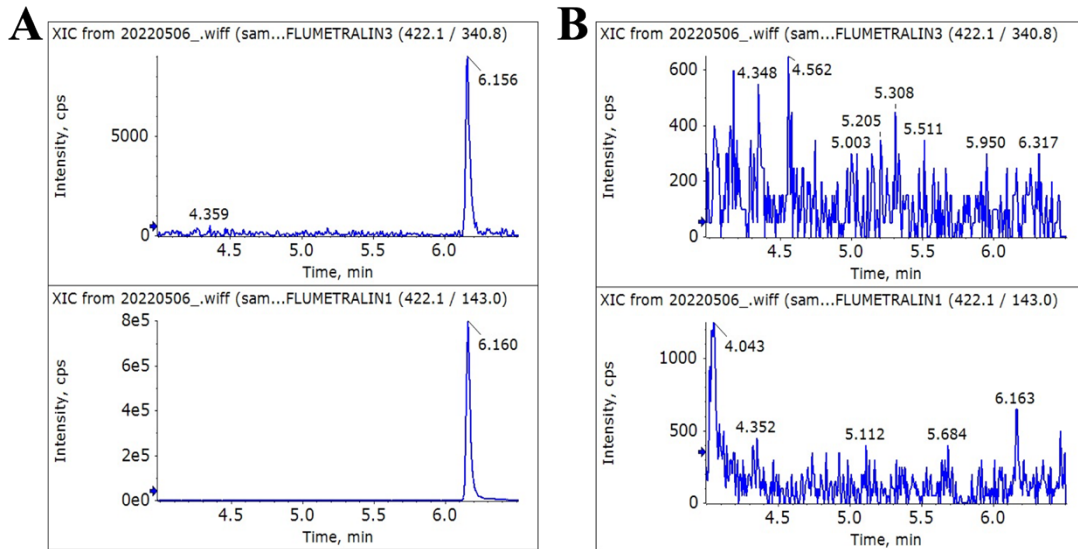

**Figure S4.** LC-MS/MS analysis of flumetralin standard (A) and flumetralin-negative orange sample (B).

**Table S1.** Instrument condition for flumetralin detection.

| Instrument conditions | AB SCIEX QTRAP 5500 system                                                                                                                                                                                                                                                                                                                                                                                                         |                  |                    |                  |                    |     |    |    |     |   |    |    |     |   |   |    |     |     |    |    |     |   |    |    |     |
|-----------------------|------------------------------------------------------------------------------------------------------------------------------------------------------------------------------------------------------------------------------------------------------------------------------------------------------------------------------------------------------------------------------------------------------------------------------------|------------------|--------------------|------------------|--------------------|-----|----|----|-----|---|----|----|-----|---|---|----|-----|-----|----|----|-----|---|----|----|-----|
| Spectrum Column       | Waters BEH C18 (2.1×50 mm, 1.7 μm)<br>Column temperature: 40 °C                                                                                                                                                                                                                                                                                                                                                                    |                  |                    |                  |                    |     |    |    |     |   |    |    |     |   |   |    |     |     |    |    |     |   |    |    |     |
| Mobile Phase          | A: 0.1% Formic acid in water<br>B: acetonitrile                                                                                                                                                                                                                                                                                                                                                                                    |                  |                    |                  |                    |     |    |    |     |   |    |    |     |   |   |    |     |     |    |    |     |   |    |    |     |
| Gradient Profile      | <table><thead><tr><th>Time (min)</th><th>Percentage A (%)</th><th>Percentage B (%)</th><th>Flow rate (mL/min)</th></tr></thead><tbody><tr><td>0.0</td><td>90</td><td>10</td><td>0.3</td></tr><tr><td>1</td><td>90</td><td>10</td><td>0.3</td></tr><tr><td>7</td><td>0</td><td>90</td><td>0.3</td></tr><tr><td>7.1</td><td>90</td><td>10</td><td>0.3</td></tr><tr><td>9</td><td>90</td><td>10</td><td>0.3</td></tr></tbody></table> | Time (min)       | Percentage A (%)   | Percentage B (%) | Flow rate (mL/min) | 0.0 | 90 | 10 | 0.3 | 1 | 90 | 10 | 0.3 | 7 | 0 | 90 | 0.3 | 7.1 | 90 | 10 | 0.3 | 9 | 90 | 10 | 0.3 |
| Time (min)            | Percentage A (%)                                                                                                                                                                                                                                                                                                                                                                                                                   | Percentage B (%) | Flow rate (mL/min) |                  |                    |     |    |    |     |   |    |    |     |   |   |    |     |     |    |    |     |   |    |    |     |
| 0.0                   | 90                                                                                                                                                                                                                                                                                                                                                                                                                                 | 10               | 0.3                |                  |                    |     |    |    |     |   |    |    |     |   |   |    |     |     |    |    |     |   |    |    |     |
| 1                     | 90                                                                                                                                                                                                                                                                                                                                                                                                                                 | 10               | 0.3                |                  |                    |     |    |    |     |   |    |    |     |   |   |    |     |     |    |    |     |   |    |    |     |
| 7                     | 0                                                                                                                                                                                                                                                                                                                                                                                                                                  | 90               | 0.3                |                  |                    |     |    |    |     |   |    |    |     |   |   |    |     |     |    |    |     |   |    |    |     |
| 7.1                   | 90                                                                                                                                                                                                                                                                                                                                                                                                                                 | 10               | 0.3                |                  |                    |     |    |    |     |   |    |    |     |   |   |    |     |     |    |    |     |   |    |    |     |
| 9                     | 90                                                                                                                                                                                                                                                                                                                                                                                                                                 | 10               | 0.3                |                  |                    |     |    |    |     |   |    |    |     |   |   |    |     |     |    |    |     |   |    |    |     |
| Injection Volume      | 5 μL                                                                                                                                                                                                                                                                                                                                                                                                                               |                  |                    |                  |                    |     |    |    |     |   |    |    |     |   |   |    |     |     |    |    |     |   |    |    |     |
| Mass Parameters       | ESI Ion Source<br>Curtain gas: 35 psi<br>Ion source gas 1: 60 psi<br>Ion source gas 2: 60 psi<br>Source Temperature: 550 °C<br>Polarity: Positive<br>Ionspray voltage: 5500 V                                                                                                                                                                                                                                                      |                  |                    |                  |                    |     |    |    |     |   |    |    |     |   |   |    |     |     |    |    |     |   |    |    |     |
| Precursor ion         | 422.1                                                                                                                                                                                                                                                                                                                                                                                                                              |                  |                    |                  |                    |     |    |    |     |   |    |    |     |   |   |    |     |     |    |    |     |   |    |    |     |
| Product ion           | 143.0, 340.8                                                                                                                                                                                                                                                                                                                                                                                                                       |                  |                    |                  |                    |     |    |    |     |   |    |    |     |   |   |    |     |     |    |    |     |   |    |    |     |
| CE/V                  | 25, 25                                                                                                                                                                                                                                                                                                                                                                                                                             |                  |                    |                  |                    |     |    |    |     |   |    |    |     |   |   |    |     |     |    |    |     |   |    |    |     |
| DP/V                  | 100                                                                                                                                                                                                                                                                                                                                                                                                                                |                  |                    |                  |                    |     |    |    |     |   |    |    |     |   |   |    |     |     |    |    |     |   |    |    |     |
| CXP/V                 | 13                                                                                                                                                                                                                                                                                                                                                                                                                                 |                  |                    |                  |                    |     |    |    |     |   |    |    |     |   |   |    |     |     |    |    |     |   |    |    |     |

**Table S2.** Different methods for the detection of flumetralin.

| Methods    | Matrices                      | LODs       | Advantages                                                           | References |
|------------|-------------------------------|------------|----------------------------------------------------------------------|------------|
| GC-MS      | Wastewater                    | 4.2 ng/mL  |                                                                      | 1          |
| GC-MS      | Tap water and wastewater      | 0.38 ng/mL |                                                                      | 2          |
| GC-MS/MS   | Traditional Chinese medicines | 0.1 ng/g   | Highly sensitive, specific, precise                                  | 3          |
| GC-MS/MS   | <i>Panax notoginseng</i>      | 0.38 ng/g  |                                                                      | 4          |
| HPLC-MS/MS | Apples and tomatoes           | 0.03 ng/g  |                                                                      | 5          |
| LFIA       | Orange                        | 33.26 ng/g | Simple, quick, user-friendly,<br>specific, portable, high throughput | This work  |

## References

1. G. Dalgic Bozyigit, M. Firat Ayyildiz, D. S. Chormey, G. Onkal Engin and S. Bakirdere, *JAOAC Int*, 2021, **104**, 91-97.
2. G. D. Bozyigit, M. F. Ayyildiz, D. S. Chormey, G. O. Engin and S. Bakirdere, *Environ Monit Assess*, 2020, **192**, 275.
3. J. Nie, S. Miao, S. J. Lehotay, W. T. Li, H. Zhou, X. H. Mao, J. W. Lu, L. Lan and S. Ji, *Food Addit Contam Part A Chem Anal Control Expo Risk Assess*, 2015, **32**, 1287-1300.
4. H. Li, J. Wu, C. Chen, W. Xin and W. Zhang, *Food Sci Hum Well*, 2021, **10**, 241-250.
5. J. Xue, S. Wang, X. You, J. Dong, L. Han and F. Liu, *Rapid Commun Mass Sp*, 2011, **25**, 3289-3297.
